# Supplementary figures and images for: LORD-Q: a long-run real-time PCR-based DNA-damage quantification method for nuclear and mitochondrial genome analysis
Source: PubMed Central journal article supplement — Nucleic Acids Res. 2013 Dec 26;42(6):e41. doi: 10.1093/nar/gkt1349 (PMC3973301; doi:10.1093/nar/gkt1349), 2013-12-26

Supplementary Figure S1

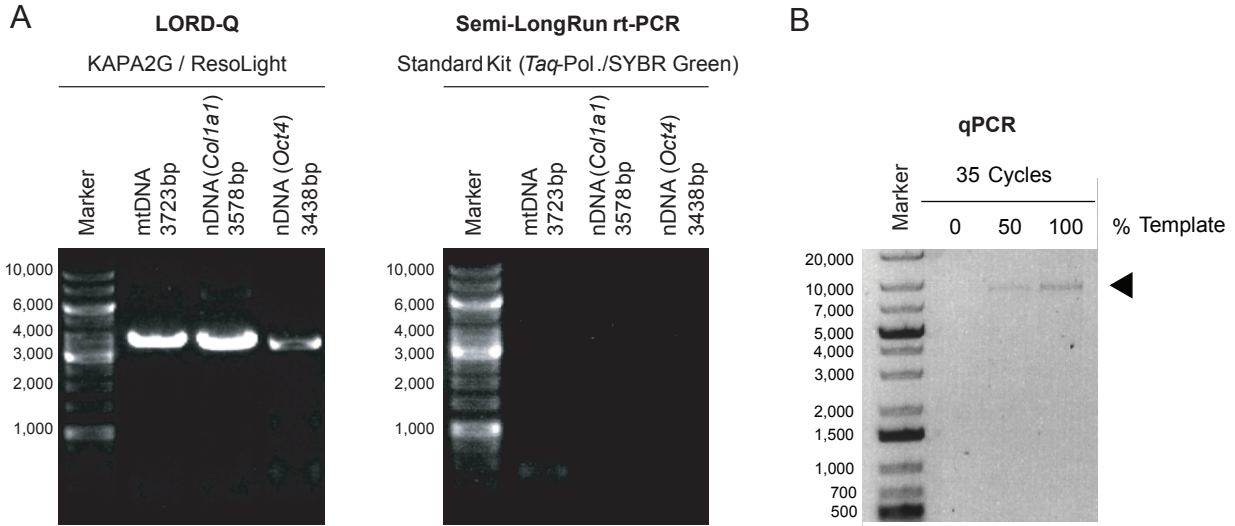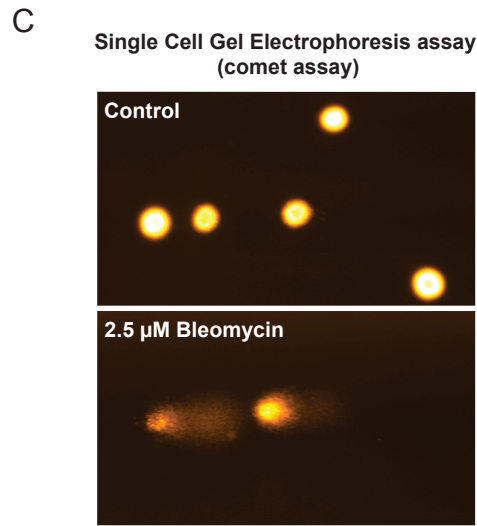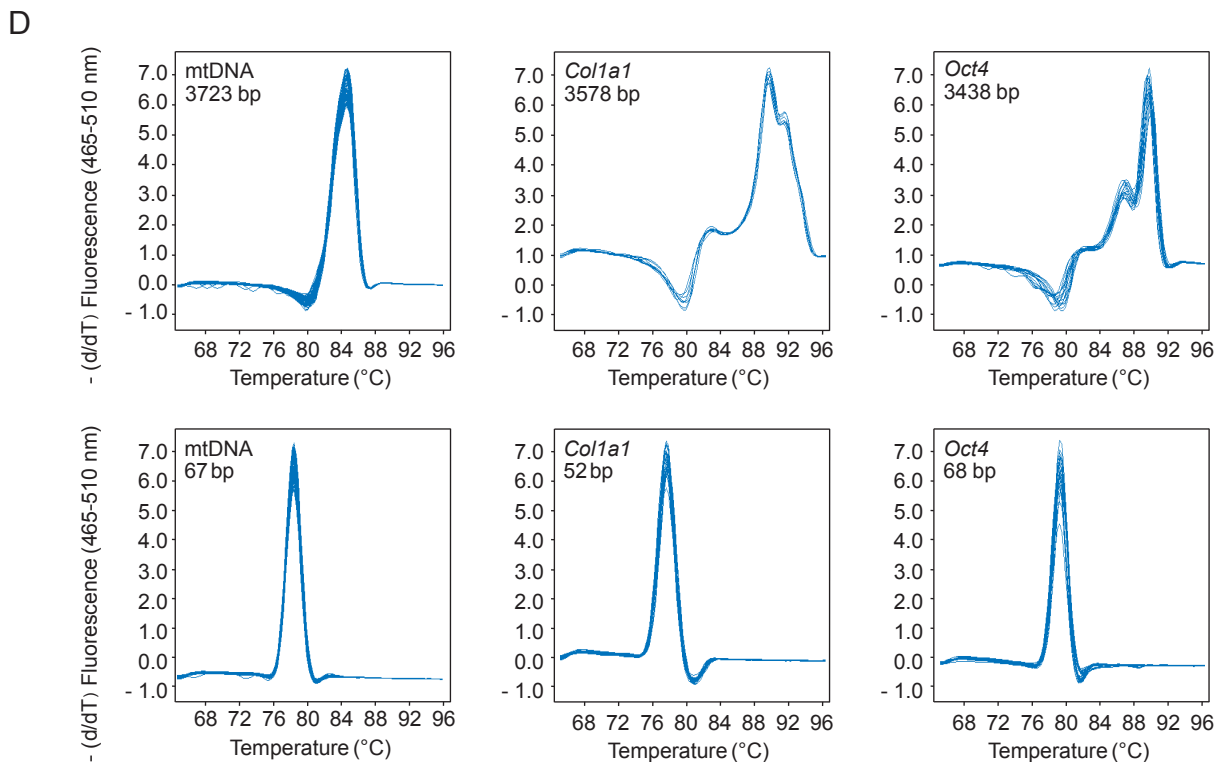

Supplement: supp_gkt1349_Figure_Resub_S1.pdf [file supp_gkt1349_Figure_Resub_S1.pdf]

Supplementary Figure S2

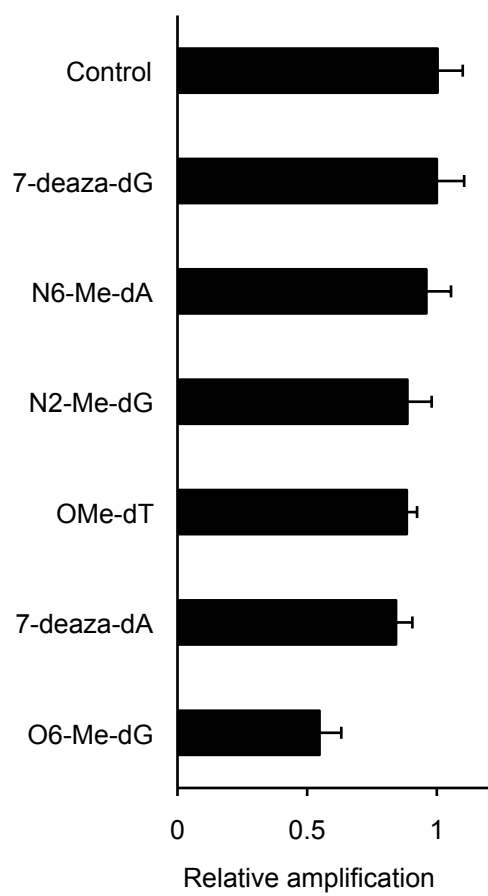

Supplement: supp_gkt1349_Figure_Resub_S2.pdf [file supp_gkt1349_Figure_Resub_S2.pdf]

Supplementary Figure S3

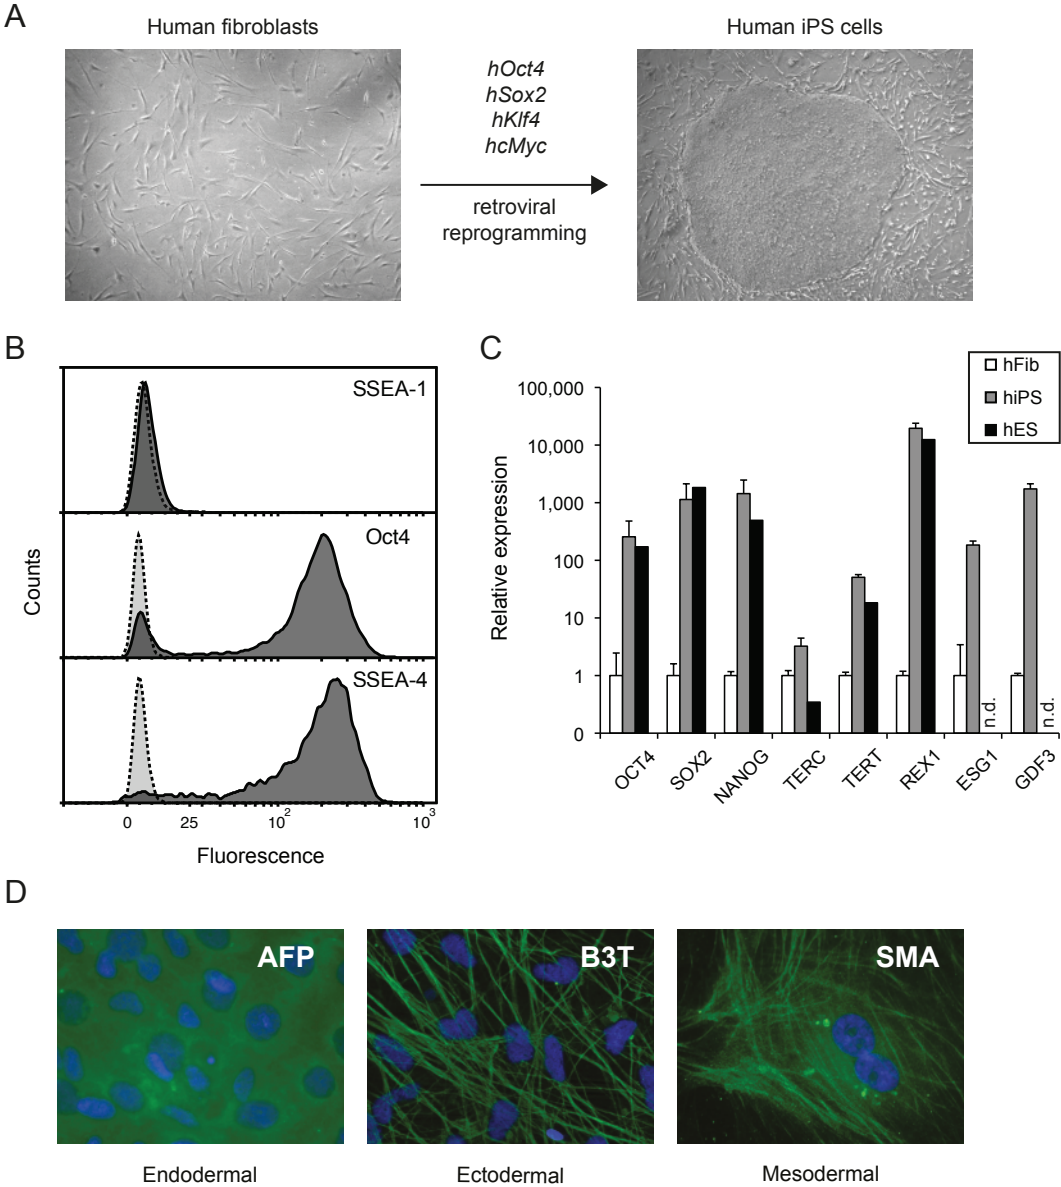

Supplement: supp_gkt1349_Figure_Resub_S3.pdf [file supp_gkt1349_Figure_Resub_S3.pdf]
